# Supplementary material for: RABL2 interacts with the intraflagellar transport-B complex and CEP19 and participates in ciliary assembly
Source: PubMed Central journal article supplement — Mol Biol Cell. 2017 Jun 15;28(12):1652–66. doi: 10.1091/mbc.E17-01-0017 (PMC5469608; doi:10.1091/mbc.e17-01-0017), 2017-06-15
Supplement: supp_E17-01-0017v1_CombinedSupMats.pdf [file supp_E17-01-0017v1_CombinedSupMats.pdf]

# Supplemental Materials

*Molecular Biology of the Cell*

Nishijima et al.

**Supplemental Materials**

**RABL2 interacts with the IFT-B complex and CEP19, and participates in ciliary assembly**

**Yuya Nishijima<sup>\*</sup>, Yohei Hagiya<sup>\*</sup>, Tomohiro Kubo<sup>†</sup>, Ryota Takei<sup>\*</sup>, Yohei Katoh<sup>\*</sup>, and Kazuhisa Nakayama<sup>\*</sup>**

<sup>\*</sup>Graduate School of Pharmaceutical Sciences, Kyoto University, Sakyo-ku, Kyoto 606-8501, Japan; and <sup>†</sup>University of Yamanashi Graduate School of Medical Science, Chuo, Yamanashi 409-3898, Japan

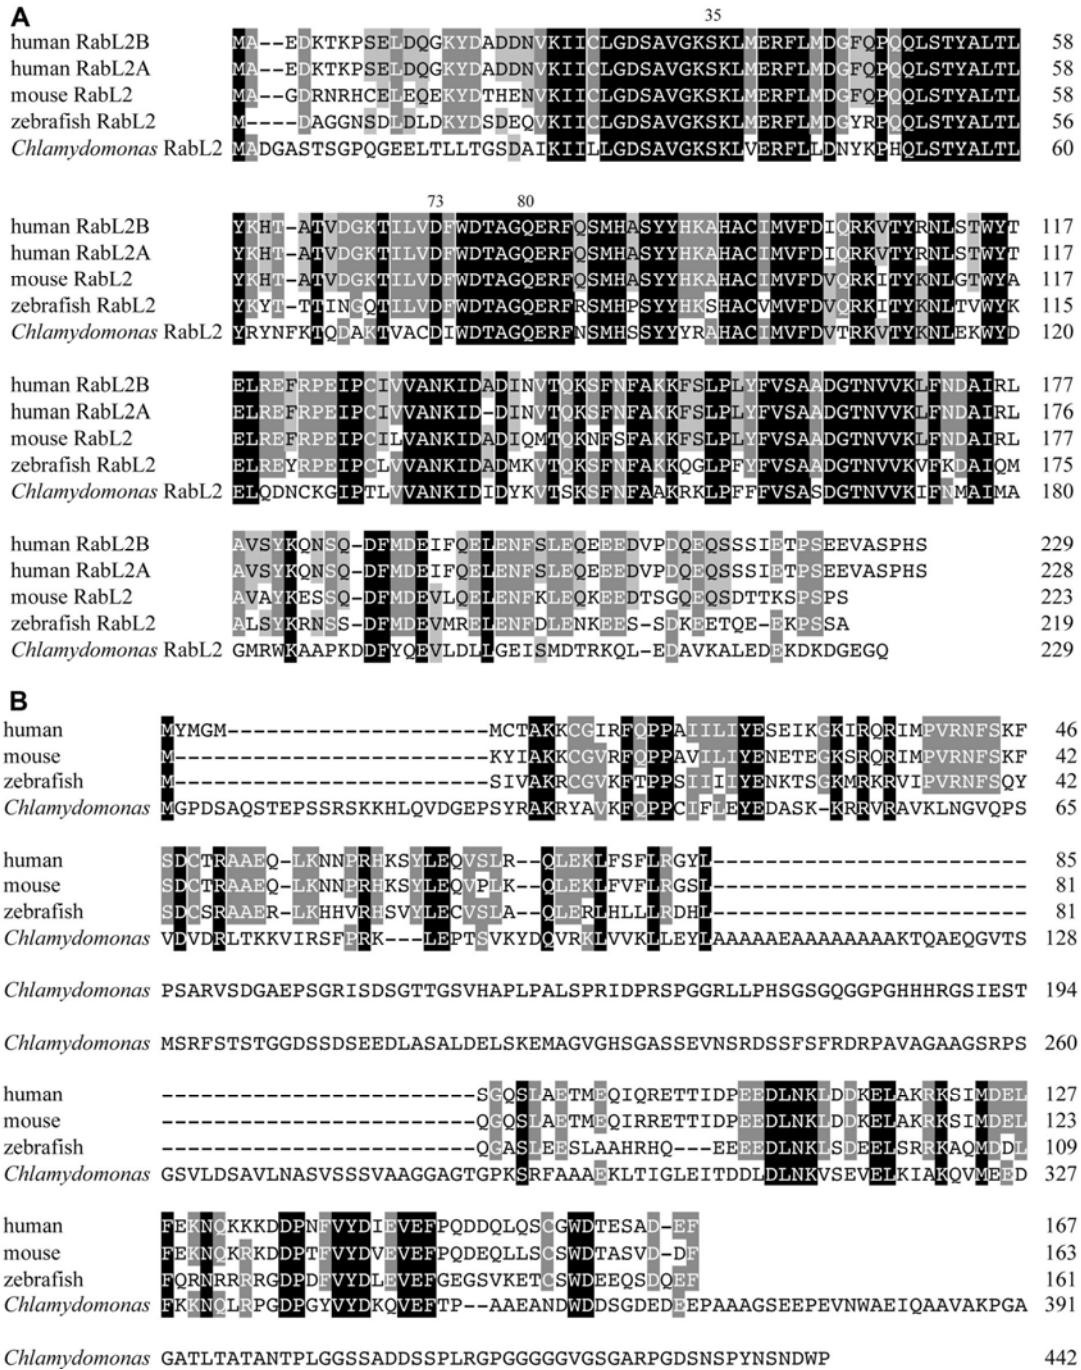

**Fig. S1. Alignments of RABL2 and CEP19 sequences**

(A) Human RABL2A (NP\_009013) and RABL2B (NP\_001003789), mouse RABL2 (NP\_081093), zebrafish RABL2 (NP\_001038428), and *Chlamydomonas reinhardtii* RABL2 (XP\_001697212) sequences are aligned. Residues conserved in all members are shown in black boxes, and those conserved in four members are shown in grey boxes. (B) Human (NP\_116287), mouse (NP\_080168), zebrafish (NP\_001028906), and *Chlamydomonas reinhardtii* CEP19 sequences are aligned. The *Chlamydomonas* CEP19 sequence was translated from the cloned cDNA sequence (see Results), which was deposited to DDBJ with accession number LC257670. Residues conserved in all members are shown in black boxes, and those conserved in three members are shown in grey boxes.

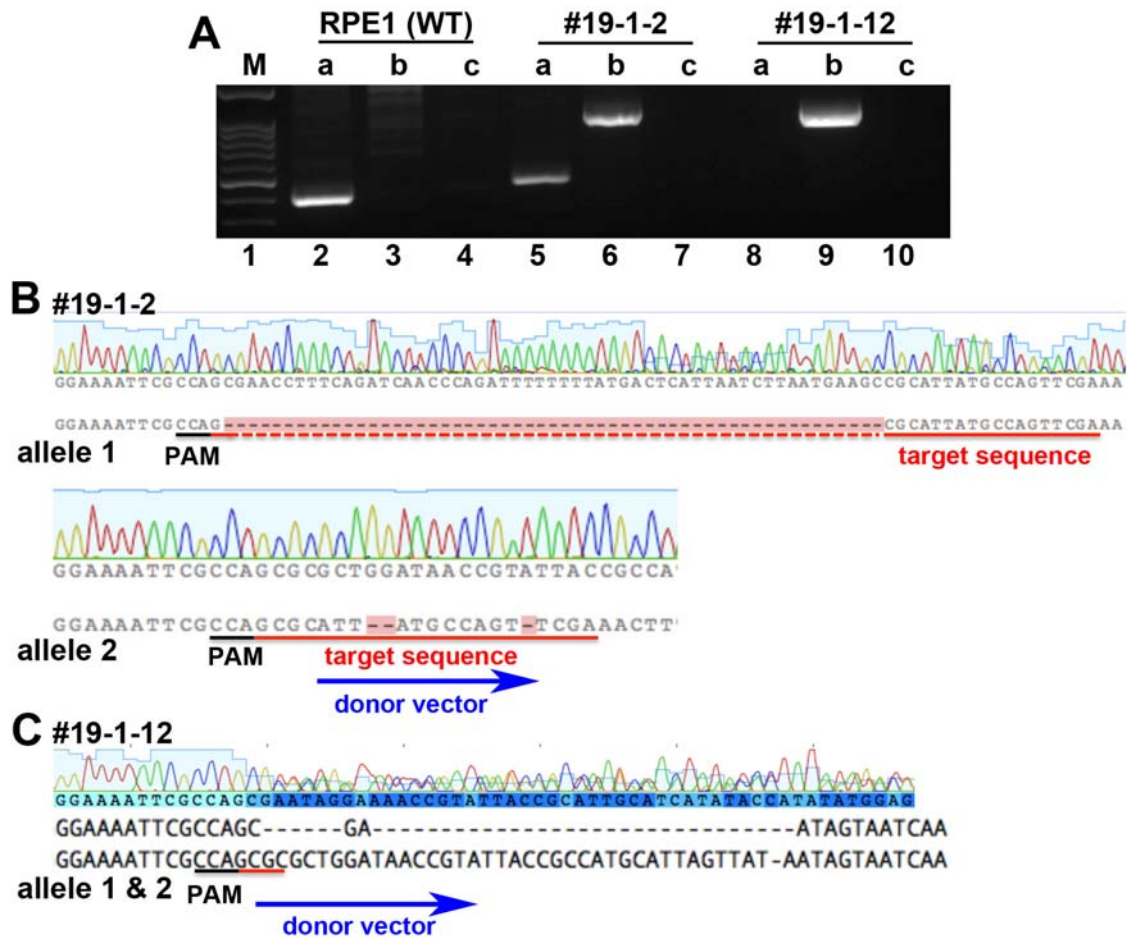

**Fig. S2. Genomic PCR and sequencing to confirm donor vector integration or deletion in the selected *CEP19*-KO cell lines**

(A) Genomic DNA was extracted from control RPE1 cells (lanes 2–4), and from *CEP19*-KO cell lines (#19-1-2, lanes 5–7; and #19-1-12, lanes 8–10) established using a donor knock-in vector containing a target sequence (see Table S2), which targets the coding region within exon 2 of the human *CEP19* gene. The DNA was subjected to PCR using primer pair a (primers 1 + 2; lanes 2, 5, and 8), pair b (primers 1 + 3; lanes 3, 6, and 9), or pair c (primers 2 + 3; lanes 4, 7, and 10) (see Table S2) to detect alleles with a small insertion, deletion, or no repair, with donor vector forward integration, or with reverse integration, respectively. Lane 1, a 100-bp ladder marker in which the most intense band is 500 bp. (B and C) Alignments of allele sequences of cell lines #19-1-2 (B) and #19-1-12 (C) that were determined by direct sequencing of the genomic PCR products with the reference sequence encompassing the coding sequence of exon 2. The double peaks in the chromatogram of #19-1-12 were separated computationally. Red and black lines indicate the target sequences and PAM sequence, respectively. Blue arrows indicate the direction of vector integration.

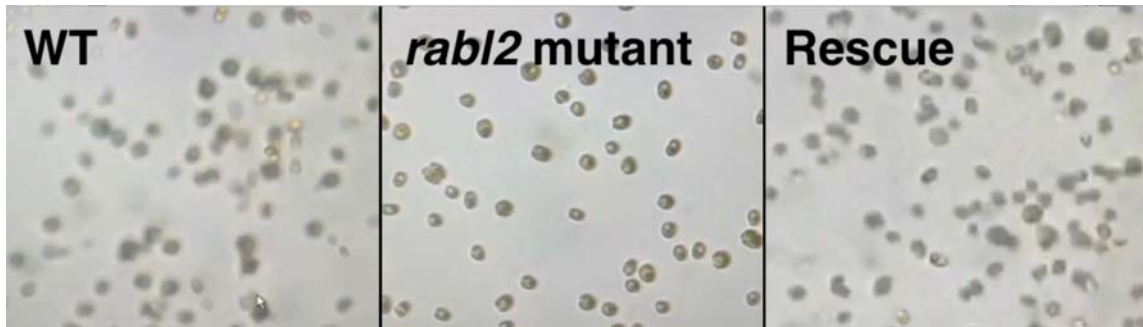

**Movie S1. Video microscopy of a control *Chlamydomonas* strain, a *rabl2* strain, and its transformant with the RABL2 expression vector**

Note that the three movies are played at the same frame rate, but the *rabl2* mutant shows virtually no motion owing to the lack of flagella.

**Table S1. Plasmid vectors used in this study**

| No. | Vector                     | Insert                                 |
|-----|----------------------------|----------------------------------------|
| 1   | pcDNA3-HAC                 | Human RABL2B                           |
| 2   | pcDNA3-HAC                 | Human RABL2B(S35N)                     |
| 3   | pcDNA3-HAC                 | Human RABL2B(D73G)                     |
| 4   | pcDNA3-HAC                 | Human RABL2B(Q80L)                     |
| 5   | pEGFP-N1                   | Human RABL2B                           |
| 6   | pEGFP-N1                   | Human RABL2B(S35N)                     |
| 7   | pEGFP-N1                   | Human RABL2B(D73G)                     |
| 8   | pEGFP-N1                   | Human RABL2B(Q80L)                     |
| 9   | pmCherry-N1                | Human RABL2B                           |
| 10  | pmCherry-N1                | Human RABL2B(S35N)                     |
| 11  | pmCherry-N1                | Human RABL2B(D73G)                     |
| 12  | pmCherry-N1                | Human RABL2B(Q80L)                     |
| 13  | pEGFP-C1                   | Human CEP19                            |
| 14  | pEGFP-C1                   | Human CEP19(16-167)                    |
| 15  | pCAG-EGFP-C                | Human CEP19(31-167)                    |
| 16  | pEGFP-C1                   | Human CEP19(1-150)                     |
| 17  | pEGFP-C1                   | Human CEP19(1-120)                     |
| 18  | pmCherry-C1                | Human CEP19                            |
| 19  | pTagRFP-T-C1               | Human CEP19                            |
| 20  | pRRLsinPPT-EGFP-C-IRES-Zeo | Human CEP19                            |
| 21  | pRRLsinPPT-EGFP-C-IRES-Zeo | Human CEP19(1-120)                     |
| 22  | pRRLsinPPT-EGFP-C-IRES-Zeo | Human CEP19(91-167)                    |
| 23  | pEGFP-C1                   | Human FGFR1OP                          |
| 24  | pEGFP-C1                   | Human FGFR1OP(1-179)                   |
| 25  | pEGFP-C1                   | Human FGFR1OP(1-352)                   |
| 26  | pEGFP-C1                   | Human FGFR1OP(180-379)                 |
| 27  | pEGFP-C1                   | Human FGFR1OP(353-379)                 |
| 28  | pEGFP-C1                   | Human FOR20                            |
| 29  | pmCherry-C1                | Human CEP350(3071-3117)                |
| 30  | pIC2L-BCCPC-3×HA           | <i>Chlamydomonas reinhardtii</i> RABL2 |

**Table S2. Antibodies used in this study**

| Antibody                                    | Manufacturer           | Clone or catalog number  | Dilution (purpose)                                     |
|---------------------------------------------|------------------------|--------------------------|--------------------------------------------------------|
| Monoclonal mouse anti-Ac- $\alpha$ -tubulin | Sigma-Aldrich          | 6-11B-1                  | 1:500 (immunofluorescence)                             |
| Monoclonal mouse anti- $\gamma$ -tubulin    | Sigma-Aldrich          | GTU88                    | 1:1,000 (immunofluorescence)                           |
| Monoclonal mouse anti-RABL2                 | OriGene                | OTI4A8                   | 1:200 (immunofluorescence)<br>1:1,000 (immunoblotting) |
| Polyclonal rabbit anti-CEP19                | OriGene                | AP09929PU-N              | 1:300 (immunofluorescence)                             |
| Monoclonal mouse anti-FGFR1OP               | Abnova                 | 2B1                      | 1:10,000 (immunofluorescence)                          |
| Monoclonal mouse anti-ODF2                  | Abnova                 | 1A1                      | 1:200 (immunofluorescence)                             |
| Polyclonal rabbit anti-IFT88                | Proteintech            | 13967-1-AP               | 1:200 (immunofluorescence)<br>1:1,000 (immunoblotting) |
| Monoclonal mouse anti-actin                 | EMD Millipore          | C4                       | 1:2,000 (immunoblotting)                               |
| Monoclonal rat anti-HA                      | Roche Applied Science  | 3F10                     | 1:1,000 (immunoblotting)                               |
| Monoclonal mouse anti-GFP                   | BD Biosciences         | JL-8                     | 1:1,000 (immunoblotting)                               |
| Polyclonal rabbit anti-mRFP                 | MBL Life Science       | PM005                    | 1:1,000 (immunoblotting)                               |
| Polyclonal rabbit anti-tRFP                 | Evrogen                | AB233                    | 1:1,000 (immunoblotting)                               |
| AlexaFluor-conjugated secondary             | Molecular Probes       | A21240, A11034, A21127   | 1:1,000 (immunofluorescence)                           |
| DyLight 649-conjugated secondary            | Jackson ImmunoResearch | 115-495-209              | 1:1,000 (immunofluorescence)                           |
| Peroxidase-conjugated secondary             | Jackson ImmunoResearch | 115-035-166, 111-035-144 | 1:3,000 (immunoblotting)                               |

**Table S3. Oligo DNAs used in this study**

| No. | Name                  | Sequence                               |
|-----|-----------------------|----------------------------------------|
| 1   | hCep19-G2-FW          | 5'-CGGACTAGAACCAGATCTTCTG-3'           |
| 2   | hCep19-G2-RV          | 5'-CTGAAGCTCACTGAGAGTAAG-3'            |
| 3   | pTagBFP-N-RV          | 5'-GTTGTCCACGGTGCCCTCCATGTAC-3'        |
| 4   | hCep19-gRNA2-S        | 5'-CACCGTTCGAACTGGCATAATGCGC-3'        |
| 5   | hCep19-gRNA2-AS       | 5'-AAACGCGCATTATGCCAGTTCGAAC-3'        |
| 6   | hCep19-gRNA2-donor-AS | 5'-TCCAGCGCATTATGCCAGTTCGAAC-3'        |
| 7   | CrRabL2-G Fw          | 5'-ACGTCATAGACCAACCCTCG-3'             |
| 8   | CrRabL2-G Rv          | 5'-ACCGTCCAAACTCACAGTCC-3'             |
| 9   | 5end-cassette-Rv      | 5'-GCACCAATCATGTCAAGCCT-3'             |
| 10  | 3end-cassette-Fw      | 5'-GACGTTACAGCACACCCTTG-3'             |
| 11  | CrRabL2-G-Rv2         | 5'-CTCCTGGTAGAAGTCGTCC-3'              |
| 12  | CrRabL2-NS            | 5'-CGGGATCCATGGCTGATGGGGCGAGCACG-3'    |
| 13  | CrRabL2-CAS           | 5'-CGGAATTCATTGCCCTCGCCGTCCTTGTC-3'    |
| 14  | CrCep19-NS-BamH1      | 5'-CGGGATCCACCATGGGGCCGGACTCAGCACAG-3' |
| 15  | CrCep19-CAS-EcoR1     | 5'-CGGAATTCCTAAGGCCAGTCGTTGCTGTTG-3'   |
